# Supplementary material for: Development and Validation of a Ferroptosis-Related Gene Signature for Overall Survival Prediction in Lung Adenocarcinoma
Source: Front Cell Dev Biol. 2021 Jul 7;9:684259. doi: 10.3389/fcell.2021.684259 (PMC8294813; doi:10.3389/fcell.2021.684259)
Supplement: Supplementary file 6 [file Table_4.XLSX]

## Sheet: PCR-1
		GAPDH		MEAN		ALOX12B		MEAN	DCT	2^-DCT	2^-DDCT
A549-Control	14.35	14.68	14.97	14.6667	26.45	27.12	27.08	26.8833	12.2167	0.000210096	1
A549-Erastin	15.65	15.48	15.78	15.6367	25.25	25.45	25.86	25.52	9.88333	0.00105882	5.03968
H1299-Control	13.25	13.84	13.68	13.59	22.87	23.45	23.12	23.1467	9.55667	0.00132787	1
H1299-Erastin	13.48	13.47	13.98	13.6433	21.48	21.35	21.32	21.3833	7.74	0.00467765	3.52266
		GAPDH		MEAN		ALOX15
A549-Control	14.35	14.68	14.97	14.6667	24.22	25.12	24.89	24.7433	10.0767	0.000926022	1
A549-Erastin	15.65	15.48	15.78	15.6367	23.97	23.45	23.47	23.63	7.99333	0.00392434	4.23785
H1299-Control	13.25	13.84	13.68	13.59	23.12	23.45	23.15	23.24	9.65	0.00124469	1
H1299-Erastin	13.48	13.47	13.98	13.6433	22.18	22.47	22.46	22.37	8.72667	0.00236054	1.89649
		GAPDH		MEAN		GPX2
A549-Control	14.35	14.68	14.97	14.6667	19.87	19.65	19.45	19.6567	4.99	0.0314674	1
A549-Erastin	15.65	15.48	15.78	15.6367	19.12	19.23	19.41	19.2533	3.61667	0.081522	2.59068
H1299-Control	13.25	13.84	13.68	13.59	18.74	17.98	17.86	18.1933	4.60333	0.0411395	1
H1299-Erastin	13.48	13.47	13.98	13.6433	17.45	17.66	17.47	17.5267	3.88333	0.0677642	1.64718
		GAPDH		MEAN		DDIT4
A549-Control	14.35	14.68	14.97	14.6667	28.56	28.74	28.45	28.5833	13.9167	6.46645e-05	1
A549-Erastin	15.65	15.48	15.78	15.6367	27.89	27.84	27.98	27.9033	12.2667	0.000202939	3.13834
H1299-Control	13.25	13.84	13.68	13.59	26.45	26.78	26.38	26.5367	12.9467	0.000126667	1
H1299-Erastin	13.48	13.47	13.98	13.6433	25.97	25.94	25.55	25.82	12.1767	0.000216002	1.70527
		GAPDH		MEAN		GDF15
A549-Control	14.35	14.68	14.97	14.6667	25.12	25.32	25.66	25.3667	10.7	0.000601145	1
A549-Erastin	15.65	15.48	15.78	15.6367	25.14	25.17	25.29	25.2	9.56333	0.00132175	2.19872
H1299-Control	13.25	13.84	13.68	13.59	24.22	24.38	24.39	24.33	10.74	0.000584706	1
H1299-Erastin	13.48	13.47	13.98	13.6433	24.1	23.88	23.98	23.9867	10.3433	0.000769744	1.31646
		GAPDH		MEAN		SLC2A1
A549-Control	14.35	14.68	14.97	14.6667	25.78	25.99	25.66	25.81	11.1433	0.000442102	1
A549-Erastin	15.65	15.48	15.78	15.6367	27.17	27.68	27.41	27.42	11.7833	0.000283703	0.641713
H1299-Control	13.25	13.84	13.68	13.59	24.55	24.69	24.78	24.6733	11.0833	0.000460876	1
H1299-Erastin	13.48	13.47	13.98	13.6433	24.98	25.12	25.13	25.0767	11.4333	0.000361596	0.784584
		GAPDH		MEAN		RRM2
A549-Control	14.35	14.68	14.97	14.6667	22.18	22.34	22.78	22.4333	7.76667	0.00459198	1
A549-Erastin	15.65	15.48	15.78	15.6367	23.98	24.13	24.07	24.06	8.42333	0.00291289	0.634342
H1299-Control	13.25	13.84	13.68	13.59	20.14	20.35	20.98	20.49	6.9	0.00837323	1
H1299-Erastin	13.48	13.47	13.98	13.6433	21.21	21.17	20.88	21.0867	7.44333	0.00574557	0.686184

## Sheet: PCR-2
		GAPDH		MEAN		ALOX12B		MEAN	DCT	2^-DCT	2^-DDCT
A549-Control	13.87	13.86	13.45	13.7267	25.13	25.78	25.94	25.6167	11.89	0.000263483	1
A549-Erastin	12.88	12.86	12.54	12.76	22.88	22.78	23.74	23.1333	10.3733	0.000753903	2.86129
H1299-Control	12.89	12.85	12.81	12.85	22.45	22.87	22.95	22.7567	9.90667	0.00104183	1
H1299-Erastin	12.71	12.82	12.91	12.8133	20.12	20.45	20.98	20.5167	7.70333	0.00479806	4.60542
		GAPDH				ALOX15
A549-Control	13.87	13.86	13.45	13.7267	24.18	24.16	23.78	24.04	10.3133	0.000785918	1
A549-Erastin	12.88	12.86	12.54	12.76	21.11	21.02	21.81	21.3133	8.55333	0.00266189	3.38698
H1299-Control	12.89	12.85	12.81	12.85	22.47	22.84	22.86	22.7233	9.87333	0.00106618	1
H1299-Erastin	12.71	12.82	12.91	12.8133	21.78	21.98	21.57	21.7767	8.96333	0.0020034	1.87905
		GAPDH				GPX2
A549-Control	13.87	13.86	13.45	13.7267	19.24	19.18	18.87	19.0967	5.37	0.0241807	1
A549-Erastin	12.88	12.86	12.54	12.76	17.86	17.85	17.87	17.86	5.1	0.0291573	1.20581
H1299-Control	12.89	12.85	12.81	12.85	17.87	18.24	18.32	18.1433	5.29333	0.0255005	1
H1299-Erastin	12.71	12.82	12.91	12.8133	17.12	16.87	16.84	16.9433	4.13	0.0571145	2.23974
		GAPDH				DDIT4
A549-Control	13.87	13.86	13.45	13.7267	27.78	27.86	27.84	27.8267	14.1	5.69478e-05	1
A549-Erastin	12.88	12.86	12.54	12.76	25.21	25.14	25.31	25.22	12.46	0.000177487	3.11666
H1299-Control	12.89	12.85	12.81	12.85	25.89	26.18	26.17	26.08	13.23	0.000104081	1
H1299-Erastin	12.71	12.82	12.91	12.8133	24.88	24.78	24.97	24.8767	12.0633	0.000233655	2.24492
		GAPDH				GDF15
A549-Control	13.87	13.86	13.45	13.7267	24.12	23.98	23.87	23.99	10.2633	0.000813633	1
A549-Erastin	12.88	12.86	12.54	12.76	22.12	22.14	22.32	22.1933	9.43333	0.00144638	1.77769
H1299-Control	12.89	12.85	12.81	12.85	23.12	22.87	23.14	23.0433	10.1933	0.000854085	1
H1299-Erastin	12.71	12.82	12.91	12.8133	23.19	23.22	23.24	23.2167	10.4033	0.000738388	0.864537
		GAPDH				SLC2A1
A549-Control	13.87	13.86	13.45	13.7267	25.12	25.36	25.42	25.3	11.5733	0.000328155	1
A549-Erastin	12.88	12.86	12.54	12.76	25.48	25.49	25.99	25.6533	12.8933	0.000131438	0.400535
H1299-Control	12.89	12.85	12.81	12.85	24.98	24.87	24.91	24.92	12.07	0.000232578	1
H1299-Erastin	12.71	12.82	12.91	12.8133	25.25	25.85	25.17	25.4233	12.61	0.00015996	0.687771
		GAPDH				RRM2
A549-Control	13.87	13.86	13.45	13.7267	22.13	22.18	22.14	22.15	8.42333	0.00291289	1
A549-Erastin	12.88	12.86	12.54	12.76	22.58	22.87	22.87	22.7733	10.0133	0.000967579	0.332171
H1299-Control	12.89	12.85	12.81	12.85	20.82	20.65	20.82	20.7633	7.91333	0.0041481	1
H1299-Erastin	12.71	12.82	12.91	12.8133	21.28	21.14	20.76	21.06	8.24667	0.00329235	0.793701

## Sheet: PCR-3
		GAPDH		MEAN		ALOX12B		MEAN	DCT	2^-DCT	2^-DDCT
A549-Control	14.87	14.89	15.18	14.98	27.71	27.12	27.18	27.3367	12.3567	0.000190666	1
A549-Erastin	15.89	15.87	15.68	15.8133	26.11	26.14	26.24	26.1633	10.35	0.000766195	4.01853
H1299-Control	13.55	13.58	13.92	13.6833	23.27	23.27	22.82	23.12	9.43667	0.00144305	1
H1299-Erastin	13.72	13.81	13.82	13.7833	22.28	22.22	21.85	22.1167	8.33333	0.00310039	2.14851
		GAPDH				ALOX15
A549-Control	14.87	14.89	15.18	14.98	24.32	24.55	24.38	24.4167	9.43667	0.00144305	1
A549-Erastin	15.89	15.87	15.68	15.8133	24.22	24.11	24.32	24.2167	8.40333	0.00295355	2.04675
H1299-Control	13.55	13.58	13.92	13.6833	23.31	23.52	23.35	23.3933	9.71	0.00119398	1
H1299-Erastin	13.72	13.81	13.82	13.7833	22.88	22.94	22.9	22.9067	9.12333	0.00179309	1.50177
		GAPDH				GPX2
A549-Control	14.87	14.89	15.18	14.98	20.33	20.63	20.58	20.5133	5.53333	0.0215924	1
A549-Erastin	15.89	15.87	15.68	15.8133	19.39	19.37	19.37	19.3767	3.56333	0.0845921	3.91768
H1299-Control	13.55	13.58	13.92	13.6833	17.83	18.25	18.35	18.1433	4.46	0.0454366	1
H1299-Erastin	13.72	13.81	13.82	13.7833	17.52	17.58	17.95	17.6833	3.9	0.0669858	1.47427
		GAPDH				DDIT4
A549-Control	14.87	14.89	15.18	14.98	28.33	28.46	28.48	28.4233	13.4433	8.97746e-05	1
A549-Erastin	15.89	15.87	15.68	15.8133	27.25	27.81	27.86	27.64	11.8267	0.000275308	3.06666
H1299-Control	13.55	13.58	13.92	13.6833	25.78	25.47	25.94	25.73	12.0467	0.00023637	1
H1299-Erastin	13.72	13.81	13.82	13.7833	25.52	25.45	25.23	25.4	11.6167	0.000318445	1.34723
		GAPDH				GDF15
A549-Control	14.87	14.89	15.18	14.98	23.78	23.52	23.41	23.57	8.59	0.00259509	1
A549-Erastin	15.89	15.87	15.68	15.8133	23.14	23.12	22.79	23.0167	7.20333	0.00678548	2.61474
H1299-Control	13.55	13.58	13.92	13.6833	22.99	22.93	22.93	22.95	9.26667	0.00162351	1
H1299-Erastin	13.72	13.81	13.82	13.7833	23.22	23.18	23.38	23.26	9.47667	0.00140359	0.864537
		GAPDH				SLC2A1
A549-Control	14.87	14.89	15.18	14.98	25.52	25.33	25.75	25.5333	10.5533	0.000665472	1
A549-Erastin	15.89	15.87	15.68	15.8133	26.55	26.75	26.78	26.6933	10.88	0.000530632	0.797377
H1299-Control	13.55	13.58	13.92	13.6833	25.84	25.74	26.12	25.9	12.2167	0.000210096	1
H1299-Erastin	13.72	13.81	13.82	13.7833	26.33	26.78	26.74	26.6167	12.8333	0.000137019	0.652176
		GAPDH				RRM2
A549-Control	14.87	14.89	15.18	14.98	23.86	23.98	23.85	23.8967	8.91667	0.00206926	1
A549-Erastin	15.89	15.87	15.68	15.8133	25.59	25.25	24.69	25.1767	9.36333	0.00151829	0.733736
H1299-Control	13.55	13.58	13.92	13.6833	20.36	20.96	20.55	20.6233	6.94	0.00814426	1
H1299-Erastin	13.72	13.81	13.82	13.7833	22.35	22.18	22.42	22.3167	8.53333	0.00269905	0.331405

## Sheet: Sheet3
Gene		A549-Control		A549-Erastin				Gene		H1299-Control		H1299-Erastin
ALOX12B	1	1	1	5.03968	2.86129	4.01853		ALOX12B	1	1	1	3.52266	4.60542	2.14851
ALOX15	1	1	1	4.23785	3.38698	2.04675		ALOX15	1	1	1	1.89649	1.87905	1.50177
GPX2	1	1	1	2.59068	1.20581	3.91768		GPX2	1	1	1	1.64718	2.23974	1.47427
DDIT4	1	1	1	3.13834	3.11666	3.06666		DDIT4	1	1	1	1.70527	2.24492	1.34723
GDF15	1	1	1	2.19872	1.77769	2.61474		GDF15	1	1	1	1.31646	0.864537	0.864537
SLC2A1	1	1	1	0.641713	0.400535	0.797377		SLC2A1	1	1	1	0.784584	0.687771	0.652176
RRM2	1	1	1	0.634342	0.332171	0.733736		RRM2	1	1	1	0.686184	0.793701	0.331405
