# Supplementary material for: Development and Validation of a Ferroptosis-Related Gene Signature for Overall Survival Prediction in Lung Adenocarcinoma
Source: Front Cell Dev Biol. 2021 Jul 7;9:684259. doi: 10.3389/fcell.2021.684259 (PMC8294813; doi:10.3389/fcell.2021.684259)
Supplement: Supplementary file 7 [file Table_5.XLSX]

## Sheet: Fig8C
Iron standard curve
y=0.0826x+0.0199	R2=0.9987
Iron assay 1		OD593		mean	Iron (nmol)	Ratio		Iron assay 2		OD593		mean	Iron (nmol)	Ratio		Iron assay 3		OD593		mean	Iron (nmol)	Ratio
A549 Erastin-0	0.214	0.231	0.242	0.229	2.53148	1		A549 Erastin-0	0.252	0.246	0.266	0.254667	2.84221	1		A549 Erastin-0	0.248	0.252	0.261	0.253667	2.8301	1
A549 Erastin-10	0.418	0.422	0.459	0.433	5.00121	1.97561		A549 Erastin-10	0.428	0.455	0.425	0.436	5.03753	1.7724		A549 Erastin-10	0.451	0.463	0.469	0.461	5.34019	1.88692
A549 Erastin-20	0.514	0.52	0.513	0.515667	6.00202	2.37095		A549 Erastin-20	0.498	0.482	0.498	0.492667	5.72357	2.01377		A549 Erastin-20	0.614	0.622	0.62	0.618667	7.24899	2.56139
H1299 Erastin-0	0.173	0.191	0.166	0.176667	1.8979	1		H1299 Erastin-0	0.241	0.232	0.239	0.237333	2.63236	1		H1299 Erastin-0	0.195	0.198	0.179	0.190667	2.06739	1
H1299 Erastin-10	0.402	0.415	0.422	0.413	4.75908	2.50755		H1299 Erastin-10	0.412	0.453	0.466	0.443667	5.13035	1.94895		H1299 Erastin-10	0.384	0.392	0.398	0.391333	4.49677	2.17509
H1299 Erastin-20	0.487	0.491	0.469	0.482333	5.59847	2.94982		H1299 Erastin-20	0.532	0.516	0.519	0.522333	6.08273	2.31075		H1299 Erastin-20	0.519	0.512	0.488	0.506333	5.88902	2.84853
	Iron assay 1	Iron assay 2	Iron assay 3
A549 Erastin-0	1	1	1
A549 Erastin-10	1.97561	1.7724	1.88692
A549 Erastin-20	2.37095	2.01377	2.56139
H1299 Erastin-0	1	1	1
H1299 Erastin-10	2.50755	1.94895	2.17509
H1299 Erastin-20	2.94982	2.31075	2.84853

## Sheet: Fig8H
Iron standard curve
y=0.0826x+0.0199	R2=0.9987
Iron assay 1		OD593		mean	Iron (nmol)	Ratio		Iron assay 2		OD593		mean	Iron (nmol)	Ratio		Iron assay 3		OD593		mean	Iron (nmol)	Ratio
A549 Erastin-0	0.262	0.248	0.275	0.261667	2.92696	1		A549 Erastin-0	0.228	0.254	0.248	0.243333	2.705	1		A549 Erastin-0	0.247	0.252	0.239	0.246	2.73729	1
A549 Erastin-10	0.529	0.515	0.509	0.517667	6.02623	2.05887		A549 Erastin-10	0.492	0.486	0.517	0.498333	5.79217	2.14128		A549 Erastin-10	0.532	0.515	0.548	0.531667	6.19572	2.26345
A549 Erastin+siGPX2	0.272	0.307	0.286	0.288333	3.2498	1.1103		A549 Erastin-20	0.327	0.289	0.281	0.299	3.37893	1.24914		A549 Erastin-20	0.312	0.354	0.346	0.337333	3.84302	1.40395
A549 Erastin+siDDIT4	0.284	0.328	0.276	0.296	3.34262	1.14201		H1299 Erastin-0	0.402	0.359	0.388	0.383	4.39588	1.62509		H1299 Erastin-0	0.398	0.364	0.385	0.382333	4.38781	1.60298
	Iron assay 1	Iron assay 2	Iron assay 3
A549 Erastin-0	1	1	1
A549 Erastin-10	2.05887	2.14128	2.26345
A549 Erastin+siGPX2	1.1103	1.24914	1.40395
A549 Erastin+siDDIT4	1.14201	1.62509	1.57349
